# Supplementary material
Source: ML conference proceedings conference paper supplement (https://openreview.net/forum?id=HxZpawUrv9Q)
Supplement: supplementary_material [file attachment]

493 **Supplementary Material for submission "A Conditional Randomization Test**  
 494 **for Sparse Logistic Regression in High-Dimension"**

495 **A Proofs of theoretical results in Section 3**

496 We first present some technical lemmas that are useful for the proof of the main theorem. From now  
 497 on, let  $\lesssim$  and  $\gtrsim$  denote inequalities with a hidden constant factor, i.e.  $x \lesssim y$  means that with high  
 498 probability, there exists an absolute constant  $C > 0$  such that  $x \leq Cy$ , and vice versa. As mentioned  
 499 in the main text, in what follows, without writing it explicitly, we consider  $p = p(n)$ .

500 **Lemma A.1** (Lemma E.1, [21]). *Assume Assumption 3.1, under the logistic model, we have*

$$\|\hat{\beta} - \beta^0\|_1 \lesssim s^* \sqrt{\frac{\log p}{n}} \quad \text{and} \quad \|\hat{\beta} - \beta^0\|_2 \lesssim \sqrt{\frac{s^* \log p}{n}},$$

501 *where  $s^* = \|\beta^0\|_0$ . In addition, we also have*

$$\frac{1}{n} \sum_{i=1}^n g''(\mathbf{X}_{i,*} \beta^0) [\mathbf{X}_{i,-j} (\hat{\beta} - \beta^0)]^2 \lesssim \frac{s^* \log(p)}{n},$$

502 *where  $g(x) = 1/(1 + \exp(x))$  is the sigmoid function.*

503 **Lemma A.2** (Lemma E.2 [21], concentration of the gradient and Hessian of the logistic loss function).

504 *Assume Assumption 3.1 holds, under the logistic model, we have, with  $\mathbf{v}^* \stackrel{\text{def.}}{=} (1, -\mathbf{w}^{0,j}) \in \mathbb{R}^p$ ,*

$$\|\nabla \ell(\beta^0)\|_\infty \lesssim \sqrt{n^{-1} \log p}, \quad \text{and} \\ \|\mathbf{v}^{*\top} \nabla^2 \ell(\beta^0) - \mathbb{E}_{\beta^0} [\mathbf{v}^{*\top} \nabla^2 \ell(\beta^0)]\|_\infty \lesssim \sqrt{n^{-1} \log p}.$$

505 **Lemma A.3** (Lemma E.3, [21]). *Assume Assumption 3.1 holds, under logistic model, we have*

$$\|\hat{\beta}^{d\mathbf{x}_{*,j}} - \mathbf{w}^{0,j}\|_1 \lesssim (s' \vee s^*) \sqrt{\frac{\log p}{n}},$$

506 *where  $s^* = \|\beta^0\|_0$  and  $s' = \|\mathbf{w}^{0,j}\|_0$ . In addition, we also have*

$$\frac{1}{n} \sum_{i=1}^n g''(\mathbf{X}_{i,*} \hat{\beta}) [\mathbf{X}_{i,-j} (\hat{\beta}^{d\mathbf{x}_{*,j}} - \mathbf{w}^{0,j})]^2 \lesssim \frac{(s' \vee s^*) \log(p)}{n}.$$

507 **Lemma A.4** (Lemma E.4, [21], local smoothness conditions on the loss function). *Let  $\hat{\beta}^{null} =$   
 508  $(0, \hat{\beta}_{-j}) \in \mathbb{R}^p$ , where  $\hat{\beta}$  is an estimator of  $\beta^0$ . It holds that*

$$|\mathbf{v}^{*\top} [\nabla \ell(\beta) - \nabla \ell(\beta^0) - \nabla^2 \ell(\beta^0)(\beta - \beta^0)]| \lesssim \frac{(s^* \vee s') \log p}{n}, \\ |(\hat{\mathbf{v}} - \mathbf{v}^*)^\top [\nabla \ell(\beta) - \nabla \ell(\beta^0)]| \lesssim \frac{(s^* \vee s') \log p}{n}.$$

509 *for both  $\beta = \hat{\beta}^{null}$  and  $\beta = \hat{\beta}$ , where  $\hat{\mathbf{v}} \stackrel{\text{def.}}{=} (1, (\hat{\beta}^{d\mathbf{x}_{*,j}})^\top)$ .*

510 **Remark A.1.** *We make a slight abuse of notation in the definition of  $\hat{\mathbf{v}}$  and  $\mathbf{v}^*$ , which formally*  
 511 *corresponds to the  $j = 1$  case. We use the fact that permuting the corresponding variable indices*  
 512 *position of  $\hat{\mathbf{v}}$ ,  $\mathbf{v}^*$ , and  $\nabla \ell(\beta)$  simultaneously does not change the value of  $\mathbf{v}^\top \nabla \ell(\beta)$ , and hence will*  
 513 *not change the proofs.*

514 *Proof of Theorem 3.1.* The following proof is an adaptation from [21]. Notice that our version of  
 515 the proof is shorter, with specific consideration on sparse logistic regression, and with elaboration on  
 516 the convergence rate of the decorrelated test score, which is missing from [21].

517 Denote  $\hat{\mathbf{v}} \stackrel{\text{def.}}{=} (1, -(\hat{\beta}^{d\mathbf{x}_{*,j}})^\top)$ , then the decorrelated test score can be written in a more general form  
 518 as

$$T_j^{\text{decorr}} = n^{1/2} \hat{\mathbf{I}}_{j|-j}^{-1/2} \left( \nabla_j \ell(\hat{\beta}) - (\hat{\beta}^{d\mathbf{x}_{*,j}})^\top \nabla_{\beta_{-j}} \ell(\hat{\beta}) \right) = n^{1/2} \hat{\mathbf{I}}_{j|-j}^{-1/2} \hat{\mathbf{v}}^\top \nabla \ell(\hat{\beta}). \quad (14)$$

519 Moreover, denote  $\hat{\beta}^{\text{null}} \stackrel{\text{def.}}{=} (0, \hat{\beta}_{-j})$  and  $\mathbf{v}^* \stackrel{\text{def.}}{=} (1, -\mathbf{w}^{0,j})$ , then we have, under the null hypothesis,  

$$n^{1/2} |\hat{\mathbf{v}}^\top \nabla(\hat{\beta}^{\text{null}}) - \mathbf{v}^{*\top} \nabla \ell(\beta^0)| \leq \underbrace{n^{1/2} |\mathbf{v}^{*\top} \{\nabla \ell(\beta^0) - \nabla \ell(\hat{\beta}^{\text{null}})\}|}_{A_1} + \underbrace{n^{1/2} |(\hat{\mathbf{v}} - \mathbf{v}^*)^\top \nabla \ell(\hat{\beta}^{\text{null}})|}_{A_2}$$

520 where we use the triangle inequality in the last step. From Lemma A.4, we have

$$\begin{aligned} A_1 &\leq n^{1/2} \left( |\mathbf{v}^{*\top} \nabla^2 \ell(\beta^0)(\hat{\beta}^{\text{null}} - \beta^0)| + \mathcal{O}_{\mathbb{P}} \left( \frac{(s^* \vee s') \log p}{n} \right) \right) \\ &\leq n^{1/2} \left( \|\hat{\beta}^{\text{null}} - \beta^0\|_1 \|\mathbf{v}^{*\top} \nabla^2 \ell(\beta^0)\|_\infty + \mathcal{O}_{\mathbb{P}} \left( \frac{(s^* \vee s') \log p}{n} \right) \right) \\ &\lesssim \frac{(s^* \vee s') \log p}{\sqrt{n}} \end{aligned}$$

521 where the second inequality is by Hölder inequality, and the last inequality is due to Lemma A.1  
 522 and A.2. Similarly, we can bound  $A_2$ , by using Lemma A.3 and Lemma A.4

$$\begin{aligned} A_2 &\leq n^{1/2} \left( |(\hat{\mathbf{v}} - \mathbf{v}^*)^\top \nabla \ell(\beta^0)| + \mathcal{O}_{\mathbb{P}} \left( \frac{(s^* \vee s') \log p}{n} \right) \right) \\ &\leq n^{1/2} \left( \|\hat{\mathbf{v}} - \mathbf{v}^*\|_1 \|\nabla \ell(\beta^0)\|_\infty + \mathcal{O}_{\mathbb{P}} \left( \frac{(s^* \vee s') \log p}{n} \right) \right) \lesssim \frac{(s^* \vee s') \log p}{\sqrt{n}} \end{aligned}$$

523 This implies that,

$$n^{1/2} |\hat{\mathbf{v}}^\top \nabla(\hat{\beta}^{\text{null}}) - \mathbf{v}^{*\top} \nabla \ell(\beta^0)| \lesssim n^{-1/2} (s^* \vee s') \log(p). \quad (15)$$

524 The remaining part of the proof is to bound  $\hat{\mathbf{I}}_{j|-j} - \mathbf{I}_{j|-j}$ , where, by definition

$$\mathbf{I}_{j|-j} = \mathbb{E} \{ g''(\mathbf{X}_{i,*} \beta^0) [\mathbf{X}_{i,j} - \mathbf{X}_{i,-j} \mathbf{w}^{0,j}] \mathbf{X}_{i,j} \}$$

525 Evaluating the difference between  $\hat{\mathbf{I}}_{j|-j}$  and  $\mathbf{I}_{j|-j}$  gives

$$\begin{aligned} &\hat{\mathbf{I}}_{j|-j} - \mathbf{I}_{j|-j} \\ &= \frac{1}{n} \sum_{i=1}^n g''(\mathbf{X}_{i,*} \hat{\beta}) [\mathbf{X}_{i,j} - \mathbf{X}_{i,-j} \hat{\beta}^{d\mathbf{x}_{*,j}}] \mathbf{X}_{i,j} - \mathbb{E} \{ g''(\mathbf{X}_{i,*} \beta^0) [\mathbf{X}_{i,j} - \mathbf{X}_{i,-j} \mathbf{w}^{0,j}] \mathbf{X}_{i,j} \} \\ &= \left( \frac{1}{n} \sum_{i=1}^n g''(\mathbf{X}_{i,*} \hat{\beta}) \mathbf{X}_{i,j}^2 - \mathbb{E} \{ g''(\mathbf{X}_{i,*} \beta^0) \mathbf{X}_{i,j}^2 \} \right) \\ &\quad + \left( \frac{1}{n} \sum_{i=1}^n g''(\mathbf{X}_{i,*} \hat{\beta}) \mathbf{X}_{i,-j} \hat{\beta}^{d\mathbf{x}_{*,j}} \mathbf{X}_{i,j} - \mathbb{E} \{ g''(\mathbf{X}_{i,*} \beta^0) \mathbf{X}_{i,-j} \mathbf{w}^{0,j} \mathbf{X}_{i,j} \} \right) \\ &\leq \underbrace{\left( \frac{1}{n} \sum_{i=1}^n g''(\mathbf{X}_{i,*} \hat{\beta}) \mathbf{X}_{i,j}^2 - \mathbb{E} \{ g''(\mathbf{X}_{i,*} \beta^0) \mathbf{X}_{i,j}^2 \} \right)}_C + \underbrace{\left| \frac{1}{n} \sum_{i=1}^n g''(\mathbf{X}_{i,*} \hat{\beta}) \mathbf{X}_{i,-j} (\hat{\beta}^{d\mathbf{x}_{*,j}} - \mathbf{w}^{0,j}) \mathbf{X}_{i,j} \right|}_{B_1} \\ &\quad + \underbrace{\left| \frac{1}{n} \sum_{i=1}^n [g''(\mathbf{X}_{i,*} \beta^0) - g''(\mathbf{X}_{i,*} \hat{\beta})] \mathbf{X}_{i,-j} \mathbf{w}^{0,j} \mathbf{X}_{i,j} \right|}_{B_2} + \underbrace{\left| \frac{1}{n} \sum_{i=1}^n g''(\mathbf{X}_{i,*} \beta^0) \mathbf{X}_{i,-j} \mathbf{w}^{0,j} \mathbf{X}_{i,j} - \mathbb{E} \{ g''(\mathbf{X}_{i,*} \beta^0) \mathbf{X}_{i,-j} \mathbf{w}^{0,j} \mathbf{X}_{i,j} \} \right|}_{B_3}, \end{aligned}$$

526 where the last step follows from triangle inequality.

527 We have, by Cauchy-Schwartz inequality, by Lemma A.3, and by the fact that  $g''(x) \in (0, 1)$  for  
 528 every  $x \in \mathbb{R}$ ; and  $\mathbf{X}_{i,-j}$ ,  $\mathbf{X}_{i,j}$  is sub-exponential by Assumption 3.1:

$$\begin{aligned} B_1 &\leq \sqrt{\left( \frac{1}{n} \sum_{i=1}^n g''(\mathbf{X}_{i,*} \hat{\beta}) ((\hat{\beta}^{d\mathbf{x}_{*,j}} - \mathbf{w}^{0,j})^\top \mathbf{X}_{i,-j})^2 \right) \left( \frac{1}{n} \sum_{i=1}^n g''(\mathbf{X}_{i,*} \hat{\beta}) \mathbf{X}_{i,j}^2 \right)} \\ &\lesssim \sqrt{\frac{(s^* \vee s') \log(p)}{n}}. \end{aligned}$$

529 Similarly, to bound  $B_2$ , we have, again by Cauchy-Schwartz inequality,

$$\begin{aligned} B_2 &\leq \sqrt{\frac{1}{n} \sum_{i=1}^n [g''(\mathbf{X}_{i,*} \beta^0) - g''(\mathbf{X}_{i,*} \hat{\beta})]^2 (\mathbf{X}_{i,-j} \mathbf{w}^{0,j} \mathbf{X}_{i,j})^2} \\ &\leq \sqrt{\frac{1}{n} \sum_{i=1}^n [g''(\mathbf{X}_{i,*} \beta^0) \mathbf{X}_{i,*} (\hat{\beta} - \beta^0)]^2 (\mathbf{X}_{i,-j} \mathbf{w}^{0,j} \mathbf{X}_{i,j})^2}, \end{aligned}$$

530 where the second inequality comes from using the self-concordance property of the sigmoid function  
 531 (discussed at length in [2] and extended further in [22]), that is,  $|g''(t_1) - g''(t)| \leq |t_1 - t|g''(t)$  for  
 532 a fixed constant  $t$ , and for every  $t_1 \in \mathbb{R}$  such that  $t_1$  converges to  $t$ , with  $t_1 = \hat{\beta}$ , and  $t = \beta^0$ . By  
 533 Assumption 3.1-A3 that  $\mathbf{X}_{i,j}$  is sub-exponential, applying Bernstein inequality leads to

$$B_2 \lesssim \sqrt{\frac{s^* \log p}{n}}.$$

534 To bound  $B_3$ , by direct application of Hoeffding inequality, we have  $B_3 \lesssim \sqrt{\frac{(s^* \vee s') \log p}{n}}$ . This  
 535 implies

$$|\hat{\mathbf{I}}_{j|-j} - \mathbf{I}_{j|-j}| \lesssim \sqrt{\frac{(s^* \vee s') \log p}{n}}. \quad (16)$$

536 Putting Equation (15) and (16) together, we have, under the null hypothesis,

$$T_j^{\text{decorr}} \xrightarrow{\mathcal{D}} n^{1/2} \mathbf{I}_{j|-j}^{-1/2} \mathbf{v}^{*\top} \nabla \ell(\beta^0) \stackrel{\text{def.}}{=} T_j^*,$$

537 with convergence rate  $\mathcal{O}(n^{-1/2})$ . Finally, by noting that we can decompose  $\nabla \ell(\beta^0) =$   
 538  $\frac{1}{n} \sum_{i=1}^n \nabla \ell_i(\beta^0)$ , and each  $\nabla \ell_i(\beta^0)$  has bounded first, second, and third moment, a direct ap-  
 539 plication of Berry-Esseen theorem give convergence in distribution of  $T_j^*$  to a standard normal law,  
 540 with rate  $\mathcal{O}(n^{-1/2})$ .

541 We also arrive at the second conclusion of Theorem 3.1 by noting that it is a straightforward by-  
 542 product of the result on normality of the distribution of decorrelated test score under null hypothesis,  
 543 based on the formula for the p-values of CRT-logit algorithm.

544 □

545 *Proof of Corollary 3.1.* The proof of this result is a straightforward adaptation from [6]. For shorter  
 546 notation, we denote  $\hat{\mathcal{S}} \stackrel{\text{def.}}{=} \hat{\mathcal{S}}_{\text{BY-CRT}}$  and  $\hat{k} \stackrel{\text{def.}}{=} \hat{k}_{\text{BY}}$ . If we denote  $\bar{\alpha} \stackrel{\text{def.}}{=} \frac{\alpha}{p \sum_{i=1}^p 1/i} \in (0, 1)$ , then step  
 547 1 in the procedure defined in Definition B.2 is equivalent to finding  $\hat{k}$  such that

$$\hat{k} = \max \{k \in [p] \mid \hat{p}_{(k)} \leq k \bar{\alpha}\}. \quad (17)$$

548 For every  $i, j, k \in [p]$ , let us define

$$p_{i,j,k} = \begin{cases} \mathbb{P}(\hat{p}_i \in ((j-1)\bar{\alpha}, j\bar{\alpha}], i \in \hat{\mathcal{S}} \text{ and } |\hat{\mathcal{S}}| = k) & \text{if } j \geq 2 \\ \mathbb{P}(\hat{p}_i \in [0, \bar{\alpha}], i \in \hat{\mathcal{S}} \text{ and } |\hat{\mathcal{S}}| = k) & \text{if } j = 1. \end{cases} \quad (18)$$

549 Then, since  $i \in \widehat{\mathcal{S}}$  and  $|\widehat{\mathcal{S}}| = k$  implies that  $\widehat{p}_i \leq \widehat{p}_k \leq \widehat{k}\bar{\alpha} = k\bar{\alpha}$ , we have

$$\begin{aligned} \frac{|\widehat{\mathcal{S}} \cap \mathcal{S}^c|}{|\widehat{\mathcal{S}}| \vee 1} &= \sum_{k=1}^p \mathbb{1}_{|\widehat{\mathcal{S}}|=k} \frac{\sum_{i \in \mathcal{S}^c} \mathbb{1}_{i \in \widehat{\mathcal{S}}}}{k} = \sum_{i \in \mathcal{S}^c} \sum_{k=1}^p \frac{1}{k} \mathbb{1}_{|\widehat{\mathcal{S}}|=k \text{ and } i \in \widehat{\mathcal{S}}} \\ &= \sum_{i \in \mathcal{S}^c} \sum_{k=1}^p \frac{1}{k} \mathbb{1}_{|\widehat{\mathcal{S}}|=k \text{ and } i \in \widehat{\mathcal{S}} \text{ and } 0 \leq \widehat{p}_i \leq k\bar{\alpha}}. \end{aligned}$$

550 Taking the expectation and writing that

$$\mathbb{1}_{0 \leq \widehat{p}_i \leq k\bar{\alpha}} = \mathbb{1}_{\widehat{p}_i \in [0, \bar{\alpha}]} + \sum_{j=2}^k \mathbb{1}_{\widehat{p}_i \in ((j-1)\bar{\alpha}, j\bar{\alpha}]},$$

551 we get

$$\begin{aligned} \mathbb{E} \left[ \frac{|\widehat{\mathcal{S}} \cap \mathcal{S}^c|}{|\widehat{\mathcal{S}}| \vee 1} \right] &= \sum_{i \in \mathcal{S}^c} \sum_{k=1}^p \frac{1}{k} \sum_{j=1}^k p_{i,j,k} = \sum_{i \in \mathcal{S}^c} \sum_{j=1}^p \sum_{k=j}^p \frac{1}{k} p_{i,j,k} \\ &\leq \sum_{i \in \mathcal{S}^c} \sum_{j=1}^p \sum_{k=j}^p \frac{1}{j} p_{i,j,k} = \underbrace{\sum_{j=1}^p \frac{1}{j} \sum_{i \in \mathcal{S}^c} \sum_{k=j}^p p_{i,j,k}}_A. \end{aligned}$$

552 Denote  $F(j) \stackrel{\text{def.}}{=} \sum_{i \in \mathcal{S}^c} \sum_{j'=1}^j \sum_{k=1}^p p_{i,j',k}$  for all  $j \in \{1, \dots, p\}$ , and remark that  $p_{i,j',k} = 0$  if  
553  $j' > k$ , by definition of  $\widehat{\mathcal{S}}_{\text{BY-CRT}}$ . We then have

$$A = F(1) + \sum_{j=2}^p \frac{1}{j} [F(j) - F(j-1)] = \sum_{j=1}^{p-1} \left( \frac{1}{j} - \frac{1}{j+1} \right) F(j) + \frac{F(p)}{p}.$$

554 This leads to

$$\mathbb{E} \left[ \frac{|\widehat{\mathcal{S}} \cap \mathcal{S}^c|}{|\widehat{\mathcal{S}}| \vee 1} \right] \leq \sum_{j=1}^{p-1} \left( \frac{1}{j} - \frac{1}{j+1} \right) F(j) + \frac{F(p)}{p} \quad (19)$$

555 By the definition of  $p_{i,j,k}$  in Eq. (18), we have

$$F(j) = \sum_{i \in \mathcal{S}^c} \mathbb{P}(\widehat{p}_i \leq j\bar{\alpha} \text{ and } i \in \widehat{\mathcal{S}}) \leq \sum_{i \in \mathcal{S}^c} \mathbb{P}(\widehat{p}_i \leq j\bar{\alpha}).$$

556 Therefore

$$\mathbb{E} \left[ \frac{|\widehat{\mathcal{S}} \cap \mathcal{S}^c|}{|\widehat{\mathcal{S}}| \vee 1} \right] \leq \sum_{i \in \mathcal{S}^c} \sum_{j=1}^{p-1} \frac{\mathbb{P}(\widehat{p}_i \leq j\bar{\alpha})}{j(j+1)} + \sum_{i \in \mathcal{S}^c} \frac{\mathbb{P}(\widehat{p}_i \leq p\bar{\alpha})}{p}$$

557 Taking the limit where  $n \rightarrow \infty$  and  $p$  fixed, we have, using the result in Theorem 3.1,

$$\begin{aligned} \limsup_{n \rightarrow \infty} \mathbb{E} \left[ \frac{|\widehat{\mathcal{S}} \cap \mathcal{S}^c|}{|\widehat{\mathcal{S}}| \vee 1} \right] &\leq \sum_{i \in \mathcal{S}^c} \left( \sum_{j=1}^{p-1} \frac{1}{j+1} + 1 \right) \bar{\alpha} \\ &= \left( \sum_{j=1}^p \frac{1}{j} \right) |\mathcal{S}^c| \bar{\alpha}. \end{aligned}$$

558 We conclude the proof by noting that  $\bar{\alpha} \stackrel{\text{def.}}{=} \frac{\alpha}{p \sum_{j=1}^p 1/j}$ . □

## 559 B Controlling False Discovery Rate Procedures

560 **Definition B.1** (Benjamini-Hochberg procedure [5]). *Let  $\alpha \in (0, 1)$  be the predefined FDR control*  
561 *level. Let  $\hat{p}_1, \dots, \hat{p}_m$  be output  $p$ -values from an inference algorithm, e.g. Algorithm 1. We reorder*  
562 *them ascendingly, denoted by  $\hat{p}_{(1)} \leq \hat{p}_{(2)} \leq \dots \leq \hat{p}_{(p)}$  and  $\mathcal{H}_0^{(1)}, \dots, \mathcal{H}_0^{(p)}$ , then*

563

1. Find  $\hat{k}_{BH}$  such that

$$\hat{k}_{BH} = \max \left\{ k \in [p] \mid \hat{p}_{(k)} \leq \frac{k\alpha}{p} \right\}.$$

564

2. If  $\hat{k}_{BH}$  exists, take  $\hat{S} = \{j \in [p] : \hat{p}_{(j)} \leq \hat{p}_{\hat{k}_{BH}}\}$ . Otherwise  $\hat{S} = \emptyset$ .

565

**Definition B.2** (Benjamini-Yekutieli procedure [6]). Let  $\alpha \in (0, 1)$  be the predefined FDR control level. Let  $\hat{p}_1, \dots, \hat{p}_m$  be output  $p$ -values from Algorithm 1. We reorder them ascendingly, denoted by

566

 $\hat{p}_{(1)} \leq \hat{p}_{(2)} \leq \dots \leq \hat{p}_{(p)}$  and  $\mathcal{H}_0^{(1)}, \dots, \mathcal{H}_0^{(p)}$ , then

567

1. Find  $\hat{k}_{BY}$  such that

$$\hat{k}_{BY} = \max \left\{ k \in [p] \mid \hat{p}_{(k)} \leq \frac{k\alpha}{p \sum_{i=1}^p 1/i} \right\}.$$

569

2. If  $\hat{k}_{BY}$  exists, take  $\hat{S} = \{j \in [p] : \hat{p}_{(j)} \leq \hat{p}_{\hat{k}_{BY}}\}$ . Otherwise  $\hat{S} = \emptyset$ .

570

**C Setting the  $\ell_1$ -Regularization Parameter of the  $X_{*,j}$ -distillation**

571

A core issue is the dependency of the statistical power and FDR of CRT-logit on the  $\ell_1$ -regularization parameter  $\lambda_{dx}$  when doing Lasso distillation on  $x_j$  in Eq. (10). One might choose the reference value

572

 $\lambda_{\text{univ}} = \sqrt{n^{-1} \log p}$  with theoretical validity, as suggested in [21, 28]. However, experimental results in Fig. 5 show that at  $\lambda_{dx} = \lambda_{\text{univ}}$  (or  $\log_{10} \lambda / \lambda_{\text{univ}} = 0.0$  with the labeling of the figure), we do not

573

have the best possible FDR/Power with CRT-logit inference. For this experiment, we average the inference results of 100 simulations (with similar setting in Section 4.1) for different values of  $n$ 

574

and  $\lambda_{dx}$ , with  $p$  fixed. There is a clear phase transition in both FDR and average power when the regularization parameter  $\lambda_{dx}$  increases. In other words, we have found empirically that both FDR

575

and power of the method are sensitive to the  $\ell_1$ -regularization parameter. Preferably, one wants to return a high statistical power while controlling FDR under predefined level. Hence, it is necessary

576

to choose  $\lambda_{dx}$  wisely. In practice, we advise using cross-validation for  $X_{*,j}$ -distillation operator, as defined by Eq. (10). This means we would have to find  $p$  different values of  $\lambda_{dx}$  with cross-validation,

577

and we reemphasize the importance of the screening step to reduce the number of computations.

578

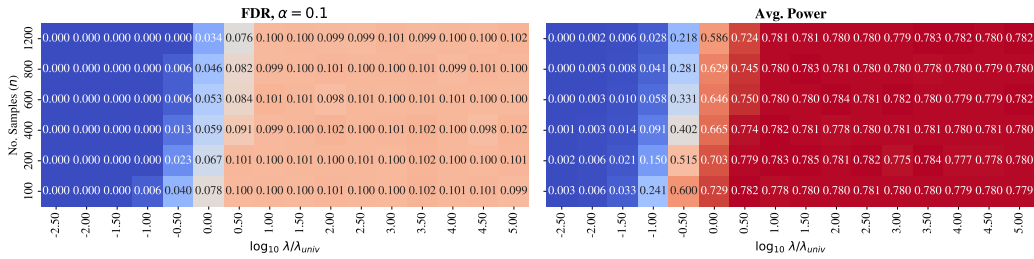

Figure 5: **FDR/Average Power of 100 runs of simulations while varying the number of samples and  $\ell_1$  regularization parameter and fixing the number of variables.** Note:  $\lambda_{dx}$  is scaled with the factor  $\lambda_{\text{univ}} = \sqrt{\log(p)/n}$ , e.g. the first value for regularization grid is  $\lambda_{dx} = 10^{-2} \lambda_{\text{univ}}$ . Default parameter (similar settings in Section 4.1):  $p = 400$ , SNR=3.0 (signal-to-noise ratio),  $\rho = 0.5$  (feature correlation),  $\kappa = 0.05$  (sparsity). FDR is controlled at level  $\alpha = 0.1$ .

## 584 D Pseudocode for CRT-logit and Related Algorithms

---

### Algorithm 2: Conditional Randomization Test [10]

---

```

1 INPUT dataset  $(\mathbf{X}, \mathbf{y})$ , with  $\mathbf{X} \in \mathbb{R}^{n \times p}$ ,  $\mathbf{y} \in \mathbb{R}^n$ , number of sampling runs  $B$ , test statistic  $T_j$ , conditional
distribution  $P_{j|-j}$  for each  $j = 1, \dots, p$ ;
2 OUTPUT vector of p-values  $\{\hat{p}_j\}_{j=1}^p$ ;
3 for  $j = 1, 2, \dots, p$  do
4   Compute test statistics  $T_j$  for original variable;
5   for  $b = 1, 2, \dots, B$  do
585 6     1. Generate  $\tilde{\mathbf{X}}_{*,j}^{(b)}$ , a knockoff sample from  $P_{j|-j}$ ;
7     2. Compute  $\tilde{T}_j^{(b)}$  for knockoff variables;
8   end
9   Compute the empirical p-value

$$\hat{p}_j = \frac{1 + \sum_{b=1}^B \mathbf{1}_{\tilde{T}_j^{(b)} \geq T_j}}{1 + B}$$

10 end

```

---

### Algorithm 3: Lasso-Distillation Conditional Randomization Test [19]

---

```

1 INPUT dataset  $(\mathbf{X}, \mathbf{y})$ ,  $\mathbf{X} \in \mathbb{R}^{n \times p}$ ,  $\mathbf{y} \in \mathbb{R}^n$ , test statistic  $T_j$  for each  $j = 1, \dots, p$ ;
2 OUTPUT vector of p-values  $\{p_j\}_{j=1}^p$ ;
3  $\hat{\mathcal{S}}^{\text{SCREENING}} = \{j : j \in [p], \hat{\beta}_j^{\text{MLE}} \neq 0\}$  // Using Eq. (2)
4 for  $j \in \hat{\mathcal{S}}^{\text{SCREENING}}$  do
5   1. Distill information of  $\mathbf{X}_{-j}$  to  $\mathbf{X}_{*,j}$  and to  $\mathbf{y}$  by finding:
      •  $\hat{\beta}^{d_{y,j}}(\lambda) \leftarrow \text{solve\_sparse\_logistic\_cv}(\mathbf{X}_{-j}, \mathbf{y})$  // Using Eq. (2)
      •  $\hat{\beta}^{d_{\mathbf{x}_{*,j}}}(\lambda) \leftarrow \text{argmin}_{\beta \in \mathbb{R}^{p-1}} \frac{1}{2} \|\mathbf{X}_{*,j} - \mathbf{X}_{-j}\beta\|_2^2 + \lambda_{dx} \|\beta\|_1$  // with  $\lambda_{dx}$  set using
586 cross-validation
      2. Obtain test statistic:

$$T_j = \sqrt{n} \frac{\langle \mathbf{y} - \mathbf{X}_{-j}\hat{\beta}^{d_{y,j}}, \mathbf{X}_{*,j} - \mathbf{X}_{-j}\hat{\beta}^{d_{\mathbf{x}_{*,j}}} \rangle}{\|\mathbf{y} - \mathbf{X}_{-j}\hat{\beta}^{d_{y,j}}\|_2 \|\mathbf{X}_{*,j} - \mathbf{X}_{-j}\hat{\beta}^{d_{\mathbf{x}_{*,j}}}\|_2}$$

      3. Compute (two-sided) p-value

$$\hat{p}_j = 2[1 - \Phi(T_j)]$$

6 end

```

---

### Algorithm 4: Holdout Randomization Test [26]

---

```

1 INPUT dataset  $(\mathbf{X}, \mathbf{y})$ , with  $\mathbf{X} \in \mathbb{R}^{n \times p}$ ,  $\mathbf{y} \in \mathbb{R}^n$ , number of sampling runs  $B$ , test statistic  $T_j$ , conditional
distribution  $P_{j|-j}$  for each  $j = 1, \dots, p$ , empirical risk  $L(\cdot)$ ;
2 OUTPUT vector of p-values  $\{\hat{p}_j\}_{j=1}^p$ ;
3  $(\mathbf{X}_{\text{train}}, \mathbf{y}_{\text{train}}), (\mathbf{X}_{\text{test}}, \mathbf{y}_{\text{test}}) \leftarrow \text{data\_splitting}(\mathbf{X}, \mathbf{y})$ ;
4  $\hat{f}_\theta \leftarrow \text{model\_fitting}(\mathbf{X}_{\text{train}}, \mathbf{y}_{\text{train}})$ ;
5 for  $j = 1, 2, \dots, p$  do
6    $T_j \leftarrow L(\mathbf{X}_{\text{test}}, \mathbf{y}_{\text{test}}, \hat{f}_\theta(\mathbf{X}_{\text{test}}))$ ;
587 7   for  $b = 1, 2, \dots, B$  do
8     1. Generate  $\tilde{\mathbf{X}}_{*,j}^{(b)} \sim P_{j|-j}$ ;
9     2.  $\tilde{T}_j^{(b)} \leftarrow L(\tilde{\mathbf{X}}_{*,j}^{(b)}, \mathbf{y}_{\text{test}}, \hat{f}_\theta(\tilde{\mathbf{X}}_{*,j}^{(b)}))$ ;
10   end
11   Compute the empirical p-value

$$\hat{p}_j = \frac{1 + \sum_{b=1}^B \mathbf{1}_{\tilde{T}_j^{(b)} \geq T_j}}{1 + B}$$

12 end

```

---

## E Time complexity of Related Methods

We present the time complexity of benchmarked methods in Table 2.

Table 2: **Time complexities of related methods with CRT-logit**, where  $p$  is the dimension size (number of variables),  $B$  is the number of sampling runs, and  $\hat{k} \ll p$  the cardinality of the screening set (see Section D for more details).

| Methods                           | Time (Iteration) Complexity | References         |
|-----------------------------------|-----------------------------|--------------------|
| Debiased Lasso                    | $\mathcal{O}(p^4)$          | [33, 28, 16]       |
| Knockoff Filter                   | $\mathcal{O}(p^3)$          | [4, 10]            |
| CRT                               | $\mathcal{O}(Bp^4)$         | [10]               |
| HRT                               | $\mathcal{O}(p^3 + Bp^2)$   | [26]               |
| dCRT (with screening )            | $\mathcal{O}(\hat{k}p^3)$   | [19]               |
| <b>CRT-logit (with screening)</b> | $\mathcal{O}(\hat{k}p^3)$   | <b>(this work)</b> |

## F Additional Details on Experiments in Section 4

### F.1 Preprocessing of the brain-imaging dataset

The Human Connectome Project dataset (HCP) is a collection of brain imaging data on healthy young adult subjects with age ranging from 22 to 35. The participants performed different tasks while being scanned by a magnetic resonance imaging (MRI) device to record blood oxygenation level dependent (BOLD) signals of the brain. The aim of this analysis is to investigate which areas of the brain can predict cognitive activity across participants, while taking into account the information from other brain regions. The brain imaging modalities include, among others, resting-state fMRI (R-fMRI) and task-evoked fMRI (T-fMRI). In this work, we only deal with decoding the task-evoked fMRI dataset. The four classification problems we are working with are as follows.

- Relational: predict whether the participant matches figures or identified feature similarities.
- Gambling: predict whether the participant gains or loses gambles.
- Emotion: predict whether the participant watches an angry face or a geometric shape.
- Social: predict whether the participant watches a movie with social behavior or not.

To perform dimension reduction, we apply a clustering scheme that preserves the spatial structure of the data. This is achieved with data-driven parcellation along with a spatially constrained clustering algorithm, following the conclusions by [29] and [27]. The hierarchical clustering scheme that we use recursively merges pair of clusters of features based on a criterion that minimized the within-cluster variance. This algorithm is implemented in `scikit-learn` [23], a popular package for applied machine learning.

### G Extra experiment: application on genome-wide association study with Human Brain Cancer Dataset

**Description** The last in our benchmark is a Genome-wide Association Study (GWAS) on the The Cancer Genome Atlas (TCGA) dataset [30, 31]. We choose to analyze the Glioma cohort, which consists of  $n = 1026$  patients across a wide age range, diagnosed with this type of brain tumor, with a total of  $p = 24776$  genes in the data matrix, recorded as copy number variations (CNVs) at the gene level in log ratio format. As with the brain-imaging inference in Section 4.3, we use clustering to reduce the dimension to  $C = 1000$  clusters. However, we use different criterion to merge variables (genes) to clusters of variables, which is the pairwise Linkage Disequilibrium, following [1, Section 4] (with available R library). For the response, a long-term survivor (LTS) is defined as a patient who survived more than five years after diagnosis and would be labeled  $y = 0$ , and otherwise would be a short-term survivor (STS), labeled  $y = 1$ . The objective is to identify significant genes that contribute to classification of the LTS/STS status. Similar to the Human Connectome Project dataset, there is no real ground-truth for the TCGA Glioma. However, we have the list of mutations and the frequency of those detected in the diagnosed patients. We therefore select the 1000 most frequent gene mutations that appeared in this list, *i.e.* the ground truth list consists of 1000 genes (variables).

Table 3: **List of detected genes associated with Glioma Cancer from the TCGA dataset.**  $n = 1026$ ,  $p = 24776$  (clustered to  $C = 1000$ ). Empty line (—) signifies no detection. Methods listed in the table are the clustering version. Commonly detected genes between methods are put in bold text. Most detected genes are listed in the mutant list database that can be found in the recorded patients [30].

| Methods      | Detected Genes                                                                                |
|--------------|-----------------------------------------------------------------------------------------------|
| dLasso       | —                                                                                             |
| KO           | <b>ABCC10</b> , <b>ANK3</b> , CDH23, PTEN, <b>SPEN</b> , <b>SVIL</b> , ZMIZ1                  |
| dCRT         | <b>ANK3</b> , <b>ANKRD30A</b> , CDH23, PTEN, RET, <b>SPEN</b> , ZMIZ1                         |
| CRT-logit    | <b>ABCC10</b> , <b>ANKRD30A</b> , BCOR, EPHA3, PPL, SPAG17, <b>SPEN</b> , <b>SVIL</b> , USP9X |
| Original CRT | <b>ABCC10</b> , BCOR, EPHA3, <b>SPEN</b> , <b>SVIL</b>                                        |
| HRT          | <b>ABCC10</b> , <b>SPEN</b>                                                                   |

**Result** The result from Table 3 shows that CRT-logit finds the largest number of genes. Moreover, most of selected genes in this table are detected in the list of mutated genes found on recorded patients. Some genes are detected by all the benchmarked methods, most prominently SPEN, which is found on over 10 % of patients in the cohort. Furthermore, this gene is known to be associated not only with brain cancer, but also with other types of cancer in The Human Protein Atlas project [17]. Note that, in the absence of a ground-truth, this does not guarantee all genes found are associated with glioma, but this experiment demonstrates the capability of CRT-logit in GWAS studies.

## H Example of decoding maps in semi-realistic brain-analysis experiment of Section 4.3

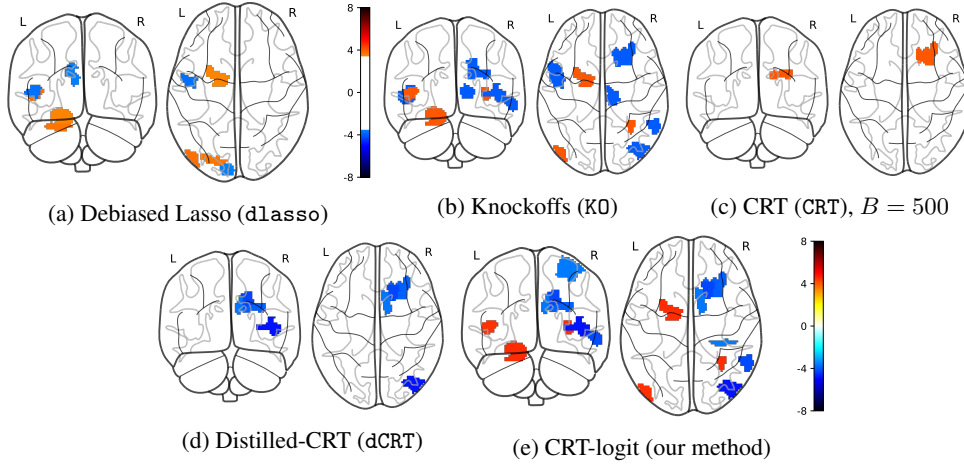

Figure 6: **Decoding maps of Relational task in semi-realistic HCP900 experiment, using 400 subjects and dimension reduction to 1000 clusters (i.e. one random seed for generating labels  $y$ ).** We omit Holdout Randomization Test (HRT) as the method does not select any brain region. For dlasso, dCRT and CRT-logit, we plot the test-statistics; for K0 the sign of selected coefficients, and for CRT the  $-\log_{10}$  of the empirical p-values.

## I Ineffectiveness of CRT in extremely high-dimensional problems

When the number of observations  $n$  is too small compared to the number of variables  $p$ , e.g. when  $n/p < 0.2$  as shown in Figure 7, the inference problem becomes too ill-posed. Indeed, the statistical power of both the original dCRT and our proposed solution CRT-logit decrease dramatically from a large value in the easy setting ( $p < n$ ) to zero when  $p > 1600$ . The failure to detect any significant variable when the dimension of the problem becomes too high hints on future direction of performing statistical inference on clusters of variables. For instance, the works of [9, 12] have provided detailed discussions on this matter.



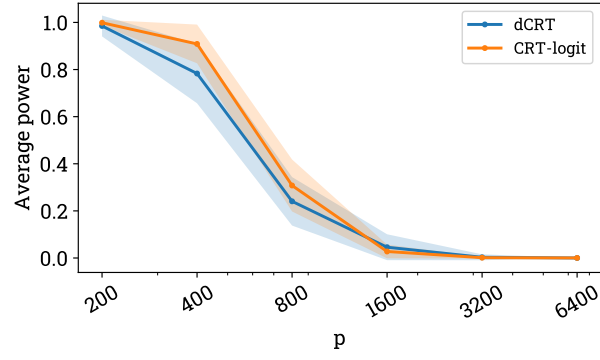

Figure 7: **FDR/Average Power of 100 runs of simulations while varying the number of variables  $p$  and fixing the number of observations  $n = 400$ .** Default parameter:  $\text{SNR} = 2.0, \rho = 0.5, \kappa = 0.04$ . FDR is controlled at level  $\alpha = 0.1$ . The experimental setup is similar to Section 4.1. Both methods (dCRT: original dCRT and CRT-logit: our version of CRT) perform well in easy settings where  $n \geq p$ , but cannot detect any variables when  $p$  becomes large compared to  $n$ .
